# Supplementary material for: Threatened Species Initiative: Empowering conservation action using genomic resources
Source: PubMed Central journal article supplement — Proc Natl Acad Sci U S A. 2022 Jan 18;119(4):e2115643118. doi: 10.1073/pnas.2115643118 (PMC8795520; doi:10.1073/pnas.2115643118), 2022-01-18
Supplement: pnas.2115643118.sapp.pdf [file pnas.2115643118.sapp.pdf]

## **Threatened Species Initiative – empowering conservation action using genomic resources**

Carolyn J. Hogg<sup>1\*</sup>, Kym Ottewell<sup>2</sup>, Peter Latch<sup>3</sup>, Maurizio Rossetto<sup>4</sup>, James Biggs<sup>5</sup>, Andrew Gilbert<sup>6</sup>, Sarah Richmond<sup>6</sup>, Katherine Belov<sup>1</sup>

<sup>1</sup> School of Life & Environmental Science, The University of Sydney, Sydney, NSW, 2006, Australia

<sup>2</sup> Biodiversity and Conservation Science, Department of Biodiversity, Conservation & Attractions, Kensington, WA, 6151, Australia

<sup>3</sup> Australian Government Department of Agriculture, Water & Environment, Canberra, ACT, 2600, Australia

<sup>4</sup> Research Centre for Ecosystem Resilience, Australian Institute of Botanical Science, The Royal Botanic Garden Sydney, Sydney 2000, NSW, Australia

<sup>5</sup> Zoo and Aquarium Association Australasia, Mosman, NSW, 2088, Australia

<sup>6</sup> Bioplatforms Australia, North Ryde, NSW, 2113, Australia

Corresponding author: [Carolyn.hogg@sydney.edu.au](mailto:Carolyn.hogg@sydney.edu.au)

Address: Rm 219, RMC Gunn Building (B19), The University of Sydney, NSW, 2006, Australia

Ph: +61-2-8627-4893

### **Supplementary Information**

We searched Title, Abstract, Keywords in Web of Science (WoS) and Scopus (January 2021) using two search strings. 1) “genom\*” AND “conservation” AND “management” AND “endangered”, and 2) “genom\*” AND “conservation” AND “management” AND “threatened” between 1900 and 2020.

This resulted in a total of 405 papers (with 74 duplicates removed between search 1 and 2; WoS) and 435 papers (92 duplicates removed between search 1 and 2; Scopus).

Combining the results from both WoS and Scopus yielded a total of 498 papers after duplicates between the two search engines (N = 315) as well as those relating to livestock or domesticated species (sheep, cattle, dogs, horses, pigs; N = 27) were removed. Titles and abstracts of the remaining 498 papers were reviewed for key terms pertaining to the types of sequencing used in the studies, including AFLP, microsatellites, mtDNA, SNPs, whole-genomes and transcriptomes, or the types of studies, and the papers were grouped accordingly (Table S1).

**Table S1:** Number of publications categorised by the types of sequencing used in the studies, including AFLP, microsatellites, mtDNA, SNPs, whole-genomes and transcriptomes, or the types of studies.

| <b>Category</b>                           | <b>Number of papers</b> |
|-------------------------------------------|-------------------------|
| Microsatellite                            | 60                      |
| Msats & NGS                               | 43                      |
| SNPs                                      | 84                      |
| WGS                                       | 25                      |
| Other sequencing (AIMS, ISSR, RAPD, AFLP) | 23                      |
| mitochondrial DNA/chloroplast DNA         | 51                      |
| Gene families                             | 9                       |
| Cryobiology                               | 20                      |
| Epigenetics                               | 2                       |
| Hybridization                             | 21                      |
| Management info only                      | 9                       |
| Pedigree                                  | 7                       |
| Reviews                                   | 89                      |
| Taxonomy                                  | 11                      |
| Transcriptome                             | 9                       |
| Other                                     | 35                      |
| <b>TOTAL</b>                              | <b>498</b>              |

**Table S2:** Genetic information can have a substantial impact on improving conservation outcomes by providing answers to some commonly asked management questions. Minimum sequencing needed is the type of sequencing required to answer the management question. RRS – reduced representation sequencing, WGR – whole genome resequencing, TC – target capture methods for specific genes.

| Questions                                                                                                                                                                                                                                                                                                                                                                          | Taxa              | Minimum sequencing needed |
|------------------------------------------------------------------------------------------------------------------------------------------------------------------------------------------------------------------------------------------------------------------------------------------------------------------------------------------------------------------------------------|-------------------|---------------------------|
| To what extent is a species genetically at risk of, or adapting to climate change? What parts of the genome/s is/are responsible for local adaptation and therefore important to preserve?                                                                                                                                                                                         | Animals<br>Plants | TC<br>WGR                 |
| Will populations recover (or rebound) after a major catastrophic event (e.g. major bushfires)?                                                                                                                                                                                                                                                                                     | Animals<br>Plants | RRS                       |
| How successful are landscape restoration programs in restoring genetic connectivity (or gene flow)?                                                                                                                                                                                                                                                                                | Animals<br>Plants | RRS                       |
| What is the population diversity and potential inbreeding effects in populations of reduced habitat or range?                                                                                                                                                                                                                                                                      | Animals<br>Plants | RRS                       |
| What is the current genetic diversity of captive (including germplasm / seed collections) or translocated populations relative to wild populations?                                                                                                                                                                                                                                | Animals<br>Plants | RRS                       |
| What is the level of genetic divergence of isolated or disjunct populations? Should these be managed as separate management units?                                                                                                                                                                                                                                                 | Animals<br>Plants | RRS                       |
| Will populations benefit from transferring new individuals from/into the population? If so, which population is the best option for transferring individuals with, and how can individuals be selected to better achieve the targeted outcomes?                                                                                                                                    | Animals<br>Plants | RRS                       |
| What is the reproductive contribution of released/translocated individuals?                                                                                                                                                                                                                                                                                                        | Animals<br>Plants | RRS                       |
| What are the best potential founder relationships for insurance populations and/or translocation programs?                                                                                                                                                                                                                                                                         | Animals<br>Plants | RRS                       |
| How can we best optimise the genetic diversity in ex-situ collections (e.g. zoo populations, seed banks, botanic garden collections)?                                                                                                                                                                                                                                              | Animals<br>Plants | RRS                       |
| What is the parentage information for captive, or intensively managed translocated wild populations? What are the pedigrees of unknown animals in group-housed populations? What is the reproductive skew (over-representation of genetic lines) that will impact long-term genetic diversity within a managed population (island, fenced, geographically isolated, captive etc.)? | Animals           | RRS                       |
| What is the presence or extent of clonality? What is the risk for and extent of hybridisation? How can kinship be minimised, and diversity be maximised within translocated individuals?                                                                                                                                                                                           | Plants            | RRS                       |

**Table S3:** The 61 species currently (to August 2021) supported by TSI and their IUCN threat status (Extinct in the Wild (EW), Critically Endangered (CR), Endangered (EN), Vulnerable (VU), Least Concern (LC), Data Deficient (DD)), the State or Territory involved in the program and the number of partners involved in the program.

| Common Name                                    | Scientific Name                     | Taxa       | IUCN Status | State/Territory | No. Partners |
|------------------------------------------------|-------------------------------------|------------|-------------|-----------------|--------------|
| Kroombit Tinker Frog                           | <i>Taudactylus pleione</i>          | Amphibian  | CR          | QLD             | 3            |
| Northern corroboree frog                       | <i>Pseudophryne pengilleyi</i>      | Amphibian  | CR          | NSW/ACT         | 9            |
| Green and golden bell frog                     | <i>Ranoidea aurea</i>               | Amphibian  | EN          | NSW             | 9            |
| Stuttering Frog                                | <i>Mixophyes balbus</i>             | Amphibian  | VU          | NSW             | 3            |
| King Island scrubtit                           | <i>Acanthornis magna greeniana</i>  | Bird       | CR          | TAS             | 4            |
| Orange-bellied parrot                          | <i>Neophema chrysogaster</i>        | Bird       | CR          | TAS/VIC         | 2            |
| Regent Honeyeater                              | <i>Anthochaera phrygia</i>          | Bird       | CR          | NSW/VIC         | 2            |
| Swift parrot                                   | <i>Lathamus discolor</i>            | Bird       | CR          | TAS/ACT         | 3            |
| Western ground parrot                          | <i>Pezoporus flaviventris</i>       | Bird       | CR          | WA              | 3            |
| Eastern bristlebird                            | <i>Dasyornis brachypterus</i>       | Bird       | EN          | VIC/NSW/QLD     | 3            |
| Forty-spotted pardalote                        | <i>Pardalotus quadragintus</i>      | Bird       | EN          | TAS             | 3            |
| King Island brown thornbill                    | <i>Acanthiza pusilla archibaldi</i> | Bird       | EN          | TAS             | 4            |
| Eastern ground parrot                          | <i>Pezoporus wallicus</i>           | Bird       | LC          | SA              | 3            |
| Murray crayfish                                | <i>Euastacus armatus</i>            | Crustacean | DD          | VIC             | 11           |
| Apline Crayfish                                | <i>Euastacus crassus</i>            | Crustacean | EN          | ACT             | 9            |
| Riek's crayfish                                | <i>Euastacus rieki</i>              | Crustacean | EN          | ACT             | 10           |
| Clarence galaxiid                              | <i>Galaxias johnstoni</i>           | Fish       | EN          | TAS             | 4            |
| Swan galaxias                                  | <i>Galaxias fontanus</i>            | Fish       | EN          | TAS             | 3            |
| Green sawfish                                  | <i>Pristis zijsron</i>              | Fish       | VU          | WA/NT/QLD       | 2            |
| Eastern chestnut mouse                         | <i>Pseudomys gracilicaudatus</i>    | Mammal     | DD          | ACT             | 5            |
| Hasting River mouse                            | <i>Pseudomys oralis</i>             | Mammal     | EN          | NSW/QLD         | 4            |
| Smoky Mouse                                    | <i>Pseudomys fumeus</i>             | Mammal     | EN          | NSW/VIC         | 3            |
| Ghost Bat                                      | <i>Macroderma gigas</i>             | Mammal     | VU          | WA/NT/QLD       | 3            |
| New Holland mouse                              | <i>Pseudomys novaehollandiae</i>    | Mammal     | VU          | NSW/VIC         | 5            |
| Mountain Pygmy-possum                          | <i>Burrhamys parvus</i>             | Marsupial  | CR          | VIC/NSW         | 3            |
| Squirrel glider                                | <i>Petaurus norfolcensis</i>        | Marsupial  | DD          | VIC             | 2            |
| Western barred bandicoot (Shark Bay bandicoot) | <i>Perameles bougainville</i>       | Marsupial  | EN          | WA              | 3            |
| Eastern barred bandicoot                       | <i>Perameles gunnii</i>             | Marsupial  | EW          | VIC             | 2            |
| Brush-tailed Rock-wallaby                      | <i>Petrogale penicillata</i>        | Marsupial  | VU          | NSW             | 5            |

| Common Name                     | Scientific Name                          | Taxa      | IUCN Status | State/Territory | No. Partners |
|---------------------------------|------------------------------------------|-----------|-------------|-----------------|--------------|
| Chuditch                        | <i>Dasyurus geoffroii</i>                | Marsupial | VU          | WA              | 6            |
|                                 | <i>Eucryphia wilkiei</i>                 | Plant     | CE          | QLD             | 6            |
|                                 | <i>Rhodamnia longisepala</i>             | Plant     | CE          | QLD             | 6            |
|                                 | <i>Zieria alata</i>                      | Plant     | CE          | QLD             | 6            |
| Native guava                    | <i>Rhodomyrtus psidioides</i>            | Plant     | CR          | NSW             | 3            |
| Nightcap oak                    | <i>Eidothea hardeniana</i>               | Plant     | CR          | NSW             | 4            |
| Spiny daisy                     | <i>Acanthocladium dockeri</i>            | Plant     | CR          | SA              | 5            |
| Sorghum                         | <i>Sorghum macrospermum</i>              | Plant     | DD          | NT              | 4            |
|                                 | <i>Acrotriche baileyana</i>              | Plant     | DD          | QLD             | 6            |
|                                 | <i>Cryptocarya bellendenkerana</i>       | Plant     | DD          | QLD             | 6            |
|                                 | <i>Elaeocarpus linsmithii</i>            | Plant     | DD          | QLD             | 6            |
|                                 | <i>Uromyrtus metrosideros</i>            | Plant     | DD          | QLD             | 6            |
|                                 | <i>Micromyrtus delicata</i>              | Plant     | E           | QLD             | 6            |
| Corrigin grevillea              | <i>Grevillea scapigera</i>               | Plant     | EN          | WA              | 3            |
| Matchstick banksia              | <i>Banksia cuneata</i>                   | Plant     | EN          | WA              | 6            |
| Myrtle family                   | <i>Lenwebbia sp.</i>                     | Plant     | EN          | NSW             | 3            |
| Prostrate flame flower          | <i>Chorizema humile</i>                  | Plant     | EN          | WA              | 8            |
|                                 | <i>Cinnamomum propinquum</i>             | Plant     | V           | QLD             | 6            |
|                                 | <i>Dracophyllum sayeri</i>               | Plant     | V           | QLD             | 6            |
|                                 | <i>Endiandra jonesii</i>                 | Plant     | V           | QLD             | 6            |
|                                 | <i>Flindersia oppositifolia</i>          | Plant     | V           | QLD             | 6            |
|                                 | <i>Litsea granitica</i>                  | Plant     | V           | QLD             | 6            |
|                                 | <i>Polyscias bellendenkerensis</i>       | Plant     | V           | QLD             | 6            |
| Silver daisy bush               | <i>Olearia pannosa ssp. pannosa</i>      | Plant     | VU          | NSW/SA          | 2            |
| Spidery wattle                  | <i>Acacia araneosa</i>                   | Plant     | VU          | SA              | 2            |
| Velvet daisy bush               | <i>Olearia pannosa ssp. cardiophylla</i> | Plant     | VU          | NSW/SA          | 2            |
| Baw baw frog                    | <i>Philoria frosti</i>                   | Reptile   | CR          | VIC             | 2            |
| Bellinger River Snapping Turtle | <i>Myuchelys georgesii</i>               | Reptile   | CR          | NSW             | 3            |
| Manning River Helmeted Turtle   | <i>Wollumbinia purvisi</i>               | Reptile   | DD          | NSW             | 2            |
| Corangamite water skink         | <i>Eulamprus tympanum marnieae</i>       | Reptile   | EN          | VIC             | 3            |
| Blue-tailed skink               | <i>Cryptoblepharus egeriae</i>           | Reptile   | EW          | CI              | 6            |
| Lister's gecko                  | <i>Lepidodactylus listeri</i>            | Reptile   | EW          | CI              | 6            |
